# Supplementary material for: An ELISA Using Synthetic Mycolic Acid-Based Antigens with DIVA Potential for Diagnosing Johne’s Disease in Cattle
Source: MDPI journal article supplement (doi:10.3390/ani14060848), 2024-03-09
Supplement: s1 [file s1]

## Supplementary information

### *An ELISA using synthetic mycolic acid based antigens with DIVA potential for diagnosing for Johne's disease in cattle*

Paul S. Mason, Thomas Holder, Natasha Robinson, Brendan Smith, Rwoa'a T. Hamed, Juma'a R. Al Dulayymi, Valerie Hughes, Karen Stevenson, Gareth J. Jones, H. Martin Vordermeier, Shawn McKenna, and Mark S. Baird

**Table S1: ELISA responses to six synthetic lipid antigens and sample information for PEI samples, together with faecal PCR cycle counts and responses in a commercial IDEXX MAP assay (0.55 recommended cut-off for positive).**

| MAP<br>Faecal<br>PCR<br>Cycles | MAP<br>IDEXX | Serum<br>ID | map<br>class | MOD171 | JRRR121 | RT237F2 | SMP70 | ZAM295 | ST123 |
|--------------------------------|--------------|-------------|--------------|--------|---------|---------|-------|--------|-------|
| % Pooled Pos Absorbance        |              |             |              |        |         |         |       |        |       |
| 26.7                           | 2.82         | PEI 123     | PEI++        | 14.4   | 20.6    | 51.9    | 112.2 | 92.6   | 74.7  |
| 22.5                           | 2.77         | PEI 48      | PEI++        | 113.5  | 112.5   | 66.5    | 102.0 | 98.8   | 82.9  |
| 23.1                           | 2.65         | PEI 144     | PEI++        | 18.5   | 71.9    | 49.9    | 102.2 | 95.4   | 84.5  |
| 20.7                           | 2.33         | PEI 217     | PEI++        | 33.9   | 132.5   | 45.6    | 76.6  | 97.6   | 88.5  |
| 25.5                           | 2.32         | PEI 103     | PEI++        | 117.3  | 111.7   | 78.8    | 93.3  | 90.2   | 66.0  |
| 23.9                           | 2.28         | PEI 64      | PEI++        | 36.4   | 52.0    | 74.6    | 61.4  | 97.1   | 94.7  |
| 26.3                           | 2.26         | PEI 163     | PEI++        | 24.8   | 113.9   | 60.4    | 108.9 | 99.6   | 97.6  |
| 24.3                           | 2.18         | PEI 114     | PEI++        | 61.7   | 35.9    | 64.2    | 94.3  | 94.8   | 47.4  |
| 27.3                           | 2.15         | PEI 9       | PEI++        | 29.8   | 26.6    | 73.0    | 89.3  | 109.3  | 85.0  |
| 29.6                           | 1.88         | PEI 122     | PEI++        | 34.0   | 78.3    | 59.2    | 88.4  | 100.1  | 100.1 |
| 24.3                           | 1.72         | PEI 46      | PEI++        | 61.1   | 40.3    | 39.2    | 74.3  | 97.4   | 75.1  |
| 30.1                           | 1.61         | PEI 73      | PEI++        | 23.6   | 37.4    | 63.0    | 64.5  | 97.5   | 95.8  |
| 33.8                           | 1.49         | PEI 208     | PEI++        | 17.0   | 17.2    | 49.5    | 42.6  | 69.3   | 27.5  |
| 34.9                           | 1.15         | PEI 200     | PEI++        | 16.8   | 25.6    | 53.8    | 61.1  | 89.1   | 29.1  |
| 36.2                           | 0.82         | PEI 139     | PEI++        | 20.0   | 32.5    | 48.2    | 88.4  | 77.1   | 43.1  |
| 31.8                           | 0.56         | PEI 173     | PEI++        | 13.8   | 16.7    | 43.3    | 74.8  | 93.8   | 33.7  |
| 35.1                           | 0.19         | PEI 4       | PEI+-        | 17.7   | 18.4    | 39.2    | 50.5  | 90.5   | 44.3  |
| 36.4                           | 0.14         | PEI 224     | PEI+-        | 16.5   | 16.5    | 61.5    | 49.3  | 70.2   | 16.7  |
| 33.2                           | 0.11         | PEI 134     | PEI+-        | 12.1   | 18.8    | 36.7    | 64.4  | 74.6   | 24.9  |
| 33.7                           | 0.07         | PEI 69      | PEI+-        | 28.3   | 66.7    | 73.8    | 74.6  | 61.5   | 27.8  |
| 36.4                           | 0.07         | PEI 165     | PEI+-        | 23.5   | 27.7    | 51.4    | 54.4  | 45.9   | 21.7  |
| 34.7                           | 0.06         | PEI 82      | PEI+-        | 17.7   | 20.0    | 86.9    | 61.5  | 99.5   | 98.5  |
| 35.5                           | 0.05         | PEI 2       | PEI+-        | 17.9   | 28.5    | 121.7   | 35.9  | 69.0   | 39.5  |
| 34.6                           | 0.05         | PEI 1       | PEI+-        | 17.2   | 45.1    | 56.2    | 49.8  | 91.8   | 72.8  |
| 35.9                           | 0.05         | PEI 83      | PEI+-        | 18.6   | 22.6    | 54.3    | 64.4  | 80.8   | 50.1  |
| 36.7                           | 0.05         | PEI 18      | PEI+-        | 27.2   | 22.8    | 90.0    | 56.7  | 66.8   | 52.0  |
| 36.2                           | 0.04         | PEI 96      | PEI+-        | 20.5   | 16.3    | 56.6    | 62.4  | 66.7   | 39.7  |

|      |      |         |       |      |      |       |       |       |      |
|------|------|---------|-------|------|------|-------|-------|-------|------|
| 36.4 | 0.04 | PEI 97  | PEI+- | 43.4 | 30.6 | 75.5  | 75.0  | 67.6  | 19.6 |
| 35.9 | 0.03 | PEI 35  | PEI+- | 27.7 | 21.8 | 56.4  | 55.6  | 44.6  | 14.2 |
| 36.3 | 0.02 | PEI 152 | PEI+- | 49.5 | 60.3 | 81.7  | 69.1  | 80.4  | 32.0 |
| 36.1 | 0.02 | PEI 38  | PEI+- | 21.1 | 23.2 | 72.0  | 77.2  | 79.7  | 36.7 |
| 36.7 | 0.02 | PEI 70  | PEI+- | 24.7 | 22.5 | 141.9 | 83.4  | 91.8  | 59.0 |
| 35.8 | 0.02 | PEI 74  | PEI+- | 18.2 | 20.8 | 46.6  | 79.1  | 81.0  | 20.6 |
| 36.4 | 0.01 | PEI 20  | PEI+- | 22.4 | 15.5 | 42.9  | 55.6  | 25.2  | 12.0 |
| 36.7 | 0.01 | PEI 54  | PEI+- | 22.6 | 30.7 | 60.9  | 45.5  | 66.5  | 22.7 |
| 36.7 | 0.11 | PEI 91  | PEI+- | 25.9 | 16.6 | 160.3 | 94.0  | 96.4  | 83.3 |
| 37.1 | 0.01 | PEI 196 | PEI+- | 22.2 | 29.8 | 40.7  | 86.5  | 68.7  | 34.8 |
| 37.1 | 0.03 | PEI 183 | PEI+- | 9.7  | 17.3 | 38.7  | 42.6  | 33.2  | 11.0 |
| 37.2 | 0.02 | PEI 100 | PEI+- | 37.3 | 15.7 | 48.0  | 55.7  | 41.8  | 24.0 |
| 37.2 | 0.10 | PEI 150 | PEI+- | 22.4 | 24.7 | 61.4  | 82.7  | 88.8  | 28.6 |
| 37.2 | 0.04 | PEI 157 | PEI+- | 24.7 | 29.6 | 54.0  | 32.8  | 64.1  | 17.8 |
| 37.2 | 0.01 | PEI 205 | PEI+- | 16.6 | 18.3 | 83.0  | 51.1  | 42.9  | 14.2 |
| 37.3 | 0.26 | PEI 31  | PEI+- | 22.7 | 28.1 | 71.7  | 53.3  | 95.1  | 44.6 |
| 37.3 | 0.06 | PEI 8   | PEI+- | 20.3 | 18.9 | 69.3  | 71.6  | 89.6  | 38.7 |
| 37.5 | 0.03 | PEI 79  | PEI+- | 48.5 | 33.4 | 80.6  | 35.6  | 50.4  | 19.7 |
| 37.7 | 0.01 | PEI 155 | PEI+- | 10.1 | 18.7 | 35.1  | 73.8  | 28.4  | 10.5 |
| 37.7 | 0.05 | PEI 15  | PEI+- | 61.4 | 40.0 | 84.5  | 71.6  | 68.3  | 21.7 |
| 37.8 | 0.04 | PEI 87  | PEI+- | 92.9 | 30.7 | 103.4 | 96.0  | 100.3 | 95.6 |
| 37.9 | 0.02 | PEI 109 | PEI+- | 54.5 | 16.4 | 50.7  | 108.1 | 61.0  | 65.6 |
| 37.9 | 0.12 | PEI 228 | PEI+- | 16.6 | 13.9 | 36.1  | 68.4  | 32.8  | 15.5 |
| 38.2 | 0.05 | PEI 102 | PEI+- | 19.1 | 11.6 | 34.0  | 78.0  | 22.1  | 12.9 |
| 38.2 | 0.02 | PEI 162 | PEI+- | 12.6 | 30.2 | 41.9  | 55.1  | 78.8  | 37.5 |
| 38.2 | 0.09 | PEI 111 | PEI+- | 26.2 | 13.4 | 35.1  | 48.5  | 48.2  | 38.1 |
| 38.3 | 0.03 | PEI 185 | PEI+- | 17.0 | 21.7 | 40.3  | 50.9  | 34.8  | 15.6 |
| 38.3 | 0.04 | PEI 121 | PEI+- | 21.9 | 16.2 | 42.5  | 65.9  | 47.6  | 20.2 |
| 38.4 | 0.01 | PEI 168 | PEI+- | 20.1 | 18.7 | 46.5  | 65.9  | 35.3  | 19.2 |
| 38.4 | 0.07 | PEI 40  | PEI+- | 37.7 | 19.9 | 64.2  | 66.2  | 92.4  | 43.2 |
| 38.5 | 0.02 | PEI 127 | PEI+- | 35.3 | 30.0 | 47.9  | 63.5  | 60.8  | 66.2 |
| 38.5 | 0.01 | PEI 174 | PEI+- | 18.8 | 14.7 | 41.6  | 55.1  | 37.1  | 12.9 |
| 38.5 | 0.02 | PEI 60  | PEI+- | 31.3 | 23.6 | 43.4  | 64.4  | 23.5  | 18.1 |
| 38.5 | 0.10 | PEI 193 | PEI+- | 77.5 | 19.6 | 161.9 | 86.9  | 98.9  | 72.8 |
| 38.5 | 0.03 | PEI 133 | PEI+- | 32.3 | 12.9 | 82.1  | 57.0  | 39.0  | 30.9 |
| 38.5 | 0.07 | PEI 141 | PEI+- | 14.8 | 20.4 | 43.6  | 73.6  | 82.4  | 28.7 |
| 38.5 | 0.22 | PEI 158 | PEI+- | 23.5 | 21.2 | 83.0  | 69.1  | 91.9  | 43.0 |
| 38.6 | 0.09 | PEI 167 | PEI+- | 22.7 | 20.8 | 94.0  | 60.6  | 53.6  | 23.5 |
| 38.6 | 0.04 | PEI 136 | PEI+- | 25.4 | 20.1 | 58.4  | 72.3  | 95.6  | 94.8 |
| 38.6 | 0.02 | PEI 203 | PEI+- | 17.5 | 57.9 | 58.3  | 25.7  | 44.3  | 16.5 |
| 38.7 | 0.03 | PEI 10  | PEI+- | 28.5 | 18.9 | 45.6  | 58.7  | 34.4  | 17.0 |
| 38.7 | 0.05 | PEI 170 | PEI+- | 16.9 | 31.4 | 56.2  | 52.9  | 104.7 | 89.4 |
| 38.9 | 0.13 | PEI 215 | PEI+- | 33.2 | 19.1 | 71.3  | 97.0  | 49.5  | 25.6 |
| 38.9 | 0.04 | PEI 44  | PEI+- | 30.1 | 45.2 | 96.3  | 69.7  | 58.8  | 41.6 |
| 39.2 | 0.13 | PEI 68  | PEI+- | 45.9 | 22.9 | 56.0  | 83.8  | 74.7  | 52.0 |
| 39.2 | 0.01 | PEI 93  | PEI+- | 41.4 | 21.2 | 68.6  | 43.6  | 36.2  | 26.4 |

|      |      |         |        |      |      |      |       |      |      |
|------|------|---------|--------|------|------|------|-------|------|------|
| 39.5 | 0.16 | PEI 221 | PEI+-  | 24.8 | 23.7 | 52.6 | 67.9  | 93.4 | 48.7 |
| 39.6 | 0.02 | PEI 130 | PEI+-  | 23.1 | 19.9 | 33.0 | 55.0  | 98.1 | 86.0 |
| 39.6 | 0.13 | PEI 72  | PEI+-  | 40.3 | 20.6 | 68.1 | 28.0  | 38.6 | 31.5 |
| 39.9 | 0.04 | PEI 26  | PEI+-  | 36.5 | 34.1 | 71.0 | 59.3  | 58.3 | 26.7 |
| 40.0 | 0.04 | PEI 153 | PEI+-  | 23.9 | 50.2 | 54.3 | 68.1  | 76.8 | 44.5 |
| 40.2 | 0.07 | PEI 71  | PEI+-  | 56.7 | 43.5 | 94.5 | 53.7  | 43.5 | 32.4 |
| 41.0 | 0.01 | PEI 6   | PEI+-  | 39.0 | 15.1 | 52.8 | 76.4  | 47.6 | 19.3 |
| 0    | 0.03 | PEI7    | PEI F5 | 25.0 | 18.8 | 48.2 | 109.8 | 62.5 | 23.8 |
| 0    | 0.03 | PEI11   | PEI F5 | 42.5 | 28.7 | 44.0 | 94.5  | 60.2 | 19.6 |
| 0    | 0.02 | PEI12   | PEI F5 | 29.9 | 53.0 | 96.0 | 85.6  | 64.5 | 21.1 |
| 0    | 0.06 | PEI13   | PEI F5 | 39.4 | 19.2 | 54.6 | 54.1  | 82.1 | 55.1 |
| 0    | 0.07 | PEI14   | PEI F5 | 20.9 | 53.7 | 63.3 | 49.6  | 46.7 | 18.4 |
| 0    | 0.06 | PEI30   | PEI F5 | 28.7 | 21.0 | 48.8 | 37.6  | 55.0 | 29.6 |
| 0    | 0.05 | PEI34   | PEI F5 | 17.2 | 14.9 | 42.4 | 30.1  | 21.7 | 12.7 |
| 0    | 0.06 | PEI37   | PEI F5 | 32.5 | 22.0 | 69.7 | 54.3  | 55.0 | 36.5 |
| 0    | 0.05 | PEI39   | PEI F5 | 18.7 | 15.1 | 39.4 | 31.3  | 50.8 | 26.4 |
| 0    | 0.17 | PEI41   | PEI F5 | 22.4 | 26.8 | 35.4 | 65.3  | 52.9 | 22.5 |
| 0    | 0.03 | PEI42   | PEI F5 | 27.4 | 16.2 | 61.8 | 46.3  | 64.2 | 44.6 |
| 0    | 0.16 | PEI52   | PEI F5 | 43.6 | 21.2 | 72.4 | 54.5  | 96.8 | 72.0 |
| 0    | 0.13 | PEI58   | PEI F5 | 21.7 | 19.0 | 52.4 | 32.0  | 99.8 | 32.3 |
| 0    | 0.06 | PEI85   | PEI F5 | 19.5 | 22.4 | 48.7 | 41.1  | 66.2 | 36.6 |
| 0    | 0.13 | PEI94   | PEI F5 | 27.9 | 18.2 | 97.5 | 57.9  | 49.0 | 17.0 |
| 0    | 0.03 | PEI95   | PEI F5 | 15.6 | 15.9 | 43.2 | 26.5  | 42.1 | 19.0 |
| 0    | 0.09 | PEI99   | PEI F5 | 15.8 | 16.3 | 55.9 | 35.3  | 73.3 | 53.5 |
| 0    | 0.10 | PEI101  | PEI F5 | 14.5 | 15.3 | 59.6 | 29.9  | 74.1 | 53.5 |
| 0    | 0.11 | PEI126  | PEI F5 | 19.0 | 19.4 | 52.7 | 40.3  | 41.8 | 13.0 |
| 0    | 0.06 | PEI128  | PEI F5 | 32.3 | 38.1 | 65.5 | 49.0  | 31.6 | 17.9 |
| 0    | 0.02 | PEI129  | PEI F5 | 22.0 | 24.1 | 40.3 | 46.0  | 40.4 | 26.0 |
| 0    | 0.03 | PEI154  | PEI F5 | 18.5 | 19.7 | 45.3 | 31.9  | 38.6 | 16.5 |
| 0    | 0.03 | PEI156  | PEI F5 | 26.4 | 19.3 | 56.1 | 42.3  | 31.8 | 16.4 |
| 0    | 0.08 | PEI160  | PEI F5 | 26.7 | 29.9 | 64.0 | 64.6  | 72.7 | 24.3 |
| 0    | 0.08 | PEI161  | PEI F5 | 27.7 | 16.6 | 66.5 | 76.5  | 35.9 | 20.0 |
| 0    | 0.10 | PEI164  | PEI F5 | 22.2 | 19.4 | 69.3 | 37.5  | 24.6 | 13.0 |
| 0    | 0.13 | PEI181  | PEI F5 | 20.8 | 18.0 | 59.4 | 43.3  | 28.1 | 12.5 |
| 0    | 0.08 | PEI182  | PEI F5 | 33.7 | 22.1 | 71.2 | 63.3  | 45.6 | 20.6 |
| 0    | 0.05 | PEI184  | PEI F5 | 31.3 | 40.1 | 50.6 | 63.9  | 40.0 | 21.6 |
| 0    | 0.12 | PEI186  | PEI F5 | 27.2 | 19.6 | 52.2 | 44.6  | 43.6 | 18.7 |
| 0    | 0.18 | PEI187  | PEI F5 | 23.8 | 16.0 | 48.9 | 38.6  | 38.6 | 16.8 |
| 0    | 0.08 | PEI189  | PEI F5 | 31.8 | 20.5 | 57.4 | 35.0  | 54.7 | 25.7 |
| 0    | 0.07 | PEI211  | PEI F5 | 26.9 | 18.8 | 54.0 | 41.8  | 63.5 | 36.7 |
| 0    | 0.08 | PEI171  | PEI F5 | 22.2 | 17.4 | 51.7 | 41.3  | 23.4 | 14.0 |
| 0    | 0.14 | PEI192  | PEI F5 | 24.6 | 18.9 | 72.8 | 42.0  | 50.7 | 31.4 |
| 0    | 0.04 | PEI197  | PEI F5 | 20.6 | 20.2 | 78.4 | 80.6  | 40.7 | 21.1 |
| 0    | 0.07 | PEI212  | PEI F5 | 18.1 | 19.1 | 45.4 | 33.0  | 53.2 | 18.0 |
| 0    | 0.03 | PEI213  | PEI F5 | 25.2 | 18.5 | 75.4 | 43.6  | 60.3 | 22.4 |
| 0    | 0.23 | PEI216  | PEI F5 | 20.2 | 17.0 | 49.7 | 28.0  | 74.8 | 22.1 |

|   |      |         |        |       |      |       |       |      |      |
|---|------|---------|--------|-------|------|-------|-------|------|------|
| 0 | 0.02 | PEI218  | PEI F5 | 62.1  | 24.0 | 63.1  | 44.9  | 44.4 | 19.0 |
| 0 | 0.05 | PEI 17  | PEI F6 | 34.0  | 14.8 | 37.4  | 61.6  | 55.1 | 25.4 |
| 0 | 0.23 | PEI 19  | PEI F6 | 24.8  | 15.2 | 35.8  | 69.1  | 75.9 | 34.9 |
| 0 | 0.02 | PEI 21  | PEI F6 | 132.1 | 13.6 | 39.4  | 84.3  | 34.9 | 14.4 |
| 0 | 0.02 | PEI 24  | PEI F6 | 21.3  | 12.2 | 35.9  | 48.5  | 32.8 | 16.6 |
| 0 | 0.07 | PEI 25  | PEI F6 | 53.5  | 25.6 | 141.9 | 52.5  | 39.9 | 14.3 |
| 0 | 0.08 | PEI 29  | PEI F6 | 56.4  | 15.7 | 44.1  | 66.6  | 54.2 | 29.8 |
| 0 | 0.03 | PEI 47  | PEI F6 | 27.8  | 15.3 | 45.1  | 53.2  | 42.9 | 13.9 |
| 0 | 0.02 | PEI 49  | PEI F6 | 21.3  | 12.8 | 36.7  | 34.6  | 16.2 | 11.1 |
| 0 | 0.11 | PEI 51  | PEI F6 | 24.4  | 16.4 | 54.1  | 63.7  | 47.7 | 20.6 |
| 0 | 0.03 | PEI 53  | PEI F6 | 39.9  | 12.8 | 49.7  | 63.2  | 55.6 | 36.4 |
| 0 | 0.10 | PEI 55  | PEI F6 | 23.9  | 12.3 | 39.1  | 50.3  | 73.5 | 24.8 |
| 0 | 0.09 | PEI 57  | PEI F6 | 19.5  | 13.5 | 29.0  | 26.0  | 52.9 | 34.0 |
| 0 | 0.17 | PEI 59  | PEI F6 | 42.7  | 17.7 | 57.6  | 71.8  | 98.3 | 82.5 |
| 0 | 0.01 | PEI 78  | PEI F6 | 26.3  | 15.4 | 45.0  | 45.8  | 23.1 | 13.2 |
| 0 | 0.06 | PEI 81  | PEI F6 | 55.9  | 14.2 | 48.3  | 58.1  | 32.7 | 21.8 |
| 0 | 0.06 | PEI 84  | PEI F6 | 27.3  | 15.2 | 59.2  | 53.9  | 36.8 | 23.6 |
| 0 | 0.03 | PEI 86  | PEI F6 | 24.2  | 14.9 | 46.9  | 33.0  | 27.1 | 16.5 |
| 0 | 0.18 | PEI 88  | PEI F6 | 59.0  | 14.7 | 45.2  | 72.9  | 52.4 | 30.3 |
| 0 | 0.19 | PEI 108 | PEI F6 | 34.2  | 20.9 | 60.7  | 62.2  | 82.1 | 67.2 |
| 0 | 0.13 | PEI 110 | PEI F6 | 44.1  | 14.9 | 54.5  | 72.2  | 69.8 | 66.4 |
| 0 | 0.05 | PEI 115 | PEI F6 | 64.7  | 16.4 | 42.8  | 63.5  | 88.7 | 70.9 |
| 0 | 0.04 | PEI 117 | PEI F6 | 56.1  | 22.6 | 47.9  | 67.4  | 33.2 | 22.5 |
| 0 | 0.03 | PEI 119 | PEI F6 | 27.7  | 13.9 | 36.6  | 51.9  | 39.7 | 35.1 |
| 0 | 0.11 | PEI 143 | PEI F6 | 16.2  | 17.0 | 42.7  | 70.7  | 84.7 | 44.6 |
| 0 | 0.02 | PEI 146 | PEI F6 | 12.0  | 11.6 | 31.2  | 82.1  | 95.3 | 63.7 |
| 0 | 0.02 | PEI 148 | PEI F6 | 9.3   | 16.2 | 36.8  | 82.3  | 93.6 | 44.8 |
| 0 | 0.02 | PEI 149 | PEI F6 | 18.1  | 38.1 | 75.5  | 52.2  | 54.2 | 29.7 |
| 0 | 0.14 | PEI 169 | PEI F6 | 13.6  | 15.8 | 46.7  | 95.3  | 49.0 | 26.2 |
| 0 | 0.02 | PEI 175 | PEI F6 | 14.2  | 17.3 | 46.4  | 74.0  | 37.1 | 19.1 |
| 0 | 0.15 | PEI 176 | PEI F6 | 16.4  | 15.5 | 46.1  | 86.4  | 79.6 | 77.2 |
| 0 | 0.04 | PEI 177 | PEI F6 | 12.6  | 10.9 | 37.6  | 43.7  | 72.8 | 53.2 |
| 0 | 0.02 | PEI 178 | PEI F6 | 36.5  | 15.7 | 50.1  | 104.8 | 90.7 | 69.5 |
| 0 | 0.04 | PEI 180 | PEI F6 | 33.4  | 28.2 | 51.7  | 92.9  | 84.8 | 60.4 |
| 0 | 0.24 | PEI 199 | PEI F6 | 21.0  | 21.2 | 46.8  | 81.5  | 68.7 | 53.7 |
| 0 | 0.09 | PEI 202 | PEI F6 | 20.7  | 35.0 | 36.3  | 58.9  | 32.5 | 21.4 |
| 0 | 0.04 | PEI 204 | PEI F6 | 19.7  | 15.8 | 82.2  | 65.4  | 38.4 | 24.2 |
| 0 | 0.14 | PEI 207 | PEI F6 | 21.3  | 13.8 | 42.6  | 90.1  | 42.4 | 19.2 |
| 0 | 0.26 | PEI 209 | PEI F6 | 14.4  | 14.8 | 36.3  | 87.4  | 40.2 | 20.9 |
| 0 | 0.02 | PEI 222 | PEI F6 | 24.8  | 39.2 | 34.2  | 90.0  | 50.1 | 30.1 |
| 0 | 0.03 | PEI 225 | PEI F6 | 13.6  | 15.2 | 38.2  | 63.3  | 26.4 | 13.8 |

**ELISA responses to six synthetic lipid antigens and sample information for PEI samples, together with faecal PCR cycle counts and responses in a commercial IDEXX MAP assay 0.55 (recommended cut-off for positive).** A faecal PCR score of 0 corresponds to no response after 50 cycles.

**Table S2: ELISA responses (% positive control) to six synthetic lipid antigens and sample information for APHA timeline samples (10 animals at 9 times). Columns 2 and 3 are results for commercial Bovigam IGRA and ParaTB IDEXX assays.**

| Serum ID     | PPDA*   | ParaTB<br>IDEXX** | MOD171                  | JRRR121 | RT237F2 | SMP70 | ZAM295 | ST123 |
|--------------|---------|-------------------|-------------------------|---------|---------|-------|--------|-------|
|              | Bovigam | (S/P, %)          | % Pooled Pos Absorbance |         |         |       |        |       |
| AP2176, Wk0  | 0.070   | 6                 | 24.7                    | 24.3    | 65.0    | 48.0  | 89.5   | 73.6  |
| AP2176, Wk4  | 0.508   |                   | 21.0                    | 23.3    | 75.9    | 29.2  | 85.9   | 46.5  |
| AP2176, Wk8  | 0.084   |                   | 25.3                    | 25.1    | 56.8    | 61.6  | 69.6   | 25.0  |
| AP2176, Wk16 | 0.405   | 5                 | 29.0                    | 26.1    | 50.8    | 50.9  | 53.3   | 11.9  |
| AP2176, Wk24 | 0.829   | 3                 | 31.7                    | 24.7    | 49.3    | 91.5  | 97.7   | 74.4  |
| AP2176, Wk32 | 2.310   |                   | 34.2                    | 21.3    | 27.2    | 51.2  | 75.9   | 10.8  |
| AP2176, Wk40 | 0.116   | 4                 | 26.2                    | 22.2    | 34.9    | 50.7  | 48.6   | 8.7   |
| AP2176, Wk45 | 1.000   | 7                 | 26.1                    | 24.3    | 28.1    | 41.1  | 54.0   | 9.4   |
| AP2176, Wk47 |         | 10                | 28.6                    | 23.6    | 26.7    | 41.8  | 57.1   | 8.9   |
| AP2169, Wk0  | 1.063   | 8                 | 24.5                    | 21.8    | 35.4    | 27.8  | 59.9   | 9.5   |
| AP2169, Wk4  | 0.622   |                   | 21.2                    | 24.7    | 35.8    | 22.5  | 31.9   | 7.8   |
| AP2169, Wk8  | 0.791   |                   | 26.7                    | 26.6    | 38.4    | 36.5  | 33.4   | 8.8   |
| AP2169, Wk16 | 1.341   | 4                 | 27.3                    | 26.4    | 36.5    | 58.9  | 64.7   | 10.6  |
| AP2169, Wk24 | 0.839   | 4                 | 31.2                    | 26.1    | 40.4    | 78.9  | 88.2   | 24.7  |
| AP2169, Wk32 | 1.693   |                   | 30.8                    | 23.2    | 28.0    | 87.4  | 95.6   | 67.1  |
| AP2169, Wk40 | 2.863   | 5                 | 65.7                    | 26.7    | 29.7    | 95.8  | 91.7   | 46.4  |
| AP2169, Wk45 | 2.657   | 9                 | 47.2                    | 29.2    | 25.7    | 98.8  | 94.9   | 41.4  |
| AP2169, Wk47 |         | 8                 | 38.9                    | 22.9    | 26.3    | 99.6  | 92.1   | 39.6  |
| AP2170, Wk0  | 0.504   | 6                 | 22.9                    | 25.0    | 71.5    | 45.7  | 88.8   | 23.3  |
| AP2170, Wk4  | 0.054   |                   | 23.0                    | 25.6    | 61.3    | 30.8  | 70.0   | 14.8  |
| AP2170, Wk8  | 0.036   |                   | 31.2                    | 26.4    | 57.9    | 37.0  | 50.1   | 12.0  |
| AP2170, Wk16 | 0.041   | 5                 | 30.6                    | 24.0    | 38.6    | 39.1  | 59.6   | 9.4   |
| AP2170, Wk24 | 0.021   | 3                 | 28.3                    | 26.2    | 40.6    | 34.1  | 74.9   | 10.9  |
| AP2170, Wk32 | 0.349   |                   | 26.0                    | 29.5    | 28.5    | 49.4  | 68.5   | 10.7  |
| AP2170, Wk40 | -0.133  | 4                 | 26.1                    | 27.8    | 25.0    | 62.4  | 48.3   | 9.8   |
| AP2170, Wk45 | 0.009   | 7                 | 24.0                    | 22.9    | 23.2    | 54.8  | 47.1   | 9.5   |
| AP2170, Wk47 |         | 10                | 23.0                    | 27.5    | 21.9    | 53.0  | 53.7   | 10.0  |
| AP2174, Wk0  | 0.049   | 11                | 22.1                    | 25.9    | 30.8    | 30.0  | 59.3   | 8.7   |
| AP2174, Wk4  | 0.075   |                   | 24.6                    | 26.1    | 41.8    | 24.6  | 33.0   | 10.0  |
| AP2174, Wk8  | 0.097   |                   | 30.5                    | 25.4    | 44.8    | 34.3  | 44.3   | 9.6   |
| AP2174, Wk16 | 0.378   | 9                 | 34.4                    | 27.1    | 61.0    | 59.8  | 39.4   | 10.3  |
| AP2174, Wk24 | 1.391   | 20                | 44.1                    | 29.3    | 37.6    | 41.4  | 71.4   | 25.6  |
| AP2174, Wk32 | 0.057   |                   | 32.9                    | 26.7    | 31.7    | 53.8  | 80.8   | 25.6  |
| AP2174, Wk40 | 0.110   | 21                | 28.0                    | 25.1    | 25.1    | 43.4  | 51.2   | 13.5  |
| AP2174, Wk45 | 0.857   | 9                 | 29.0                    | 26.6    | 24.9    | 44.8  | 56.8   | 11.9  |
| AP2174, Wk47 |         | 31                | 32.3                    | 30.8    | 27.8    | 46.1  | 71.6   | 15.4  |
| AP2180, Wk0  | -0.051  | 4                 | 22.9                    | 30.1    | 43.2    | 34.7  | 53.4   | 13.8  |
| AP2180, Wk4  | 0.058   |                   | 24.1                    | 23.5    | 31.3    | 37.1  | 30.7   | 10.9  |
| AP2180, Wk8  | 0.000   |                   | 27.3                    | 27.0    | 33.4    | 86.1  | 32.9   | 10.3  |

|              |        |    |      |      |       |      |      |      |
|--------------|--------|----|------|------|-------|------|------|------|
| AP2180, Wk16 | -0.001 | 12 | 36.1 | 34.9 | 39.8  | 70.9 | 97.5 | 75.7 |
| AP2180, Wk24 | 0.030  | 7  | 32.4 | 28.7 | 34.1  | 40.4 | 51.2 | 10.7 |
| AP2180, Wk32 | 0.415  |    | 26.2 | 27.8 | 25.6  | 70.9 | 84.9 | 44.8 |
| AP2180, Wk40 | 0.019  | 6  | 29.5 | 30.9 | 24.6  | 78.3 | 81.7 | 52.2 |
| AP2180, Wk45 | 0.109  | 8  | 30.3 | 33.4 | 26.1  | 72.5 | 72.5 | 34.5 |
| AP2180, Wk47 |        | 13 | 29.0 | 34.4 | 25.9  | 74.2 | 73.5 | 35.8 |
| AP2183, Wk0  | -0.021 | 12 | 24.1 | 41.9 | 222.8 | 22.7 | 33.4 | 10.3 |
| AP2183, Wk4  | 1.980  |    | 22.2 | 28.8 | 170.1 | 26.9 | 27.7 | 8.9  |
| AP2183, Wk8  | 0.109  |    | 24.2 | 28.3 | 110.4 | 26.2 | 39.0 | 8.8  |
| AP2183, Wk16 | 0.656  | 8  | 26.9 | 29.3 | 54.5  | 32.0 | 70.7 | 10.4 |
| AP2183, Wk24 | 0.409  | 5  | 29.8 | 26.8 | 35.6  | 31.8 | 44.0 | 10.0 |
| AP2183, Wk32 | 0.040  |    | 22.4 | 26.3 | 37.1  | 28.7 | 40.6 | 8.6  |
| AP2183, Wk40 | 0.018  | 12 | 21.6 | 22.9 | 28.4  | 29.4 | 38.6 | 8.0  |
| AP2183, Wk45 | 0.296  | 7  | 31.6 | 27.0 | 30.5  | 32.8 | 43.8 | 9.7  |
| AP2183, Wk47 |        | 5  | 46.9 | 26.2 | 39.3  | 35.6 | 47.1 | 11.0 |
| AP2184, Wk0  | 0.298  | 10 | 19.6 | 24.4 | 49.1  | 47.3 | 37.0 | 9.3  |
| AP2184, Wk4  | 0.426  |    | 20.5 | 22.7 | 51.3  | 29.0 | 24.4 | 8.3  |
| AP2184, Wk8  | 0.218  |    | 34.6 | 26.0 | 45.7  | 67.2 | 51.3 | 10.4 |
| AP2184, Wk16 | 0.256  | 10 | 29.9 | 27.3 | 34.1  | 46.6 | 46.2 | 12.2 |
| AP2184, Wk24 | 0.363  | 10 | 27.1 | 26.7 | 38.3  | 34.5 | 34.3 | 8.6  |
| AP2184, Wk32 | 0.040  |    | 20.0 | 23.1 | 24.0  | 28.9 | 33.9 | 7.7  |
| AP2184, Wk40 | 0.264  | 7  | 22.3 | 27.9 | 27.4  | 31.0 | 46.5 | 8.3  |
| AP2184, Wk45 | -0.002 | 12 | 22.5 | 27.9 | 38.3  | 46.1 | 64.2 | 9.8  |
| AP2184, Wk47 |        | 10 | 19.6 | 23.5 | 34.1  | 45.7 | 63.6 | 8.7  |
| AP2185, Wk0  | 0.050  | 4  | 18.9 | 22.9 | 33.6  | 19.8 | 28.9 | 8.1  |
| AP2185, Wk4  | 0.032  |    | 21.7 | 23.9 | 30.7  | 28.3 | 24.2 | 8.8  |
| AP2185, Wk8  | 0.005  |    | 20.5 | 26.7 | 29.9  | 45.3 | 42.6 | 9.7  |
| AP2185, Wk16 | 0.294  | 10 | 20.5 | 24.8 | 30.6  | 66.6 | 89.8 | 9.2  |
| AP2185, Wk24 | 0.369  | 7  | 22.2 | 28.0 | 28.5  | 59.8 | 76.0 | 8.6  |
| AP2185, Wk32 | 0.654  |    | 23.1 | 28.4 | 26.3  | 53.1 | 87.5 | 8.7  |
| AP2185, Wk40 | 0.062  | 15 | 21.5 | 28.2 | 24.4  | 44.2 | 68.9 | 9.5  |
| AP2185, Wk45 | 0.130  | 9  | 18.7 | 25.6 | 25.6  | 45.8 | 59.5 | 8.8  |
| AP2185, Wk47 |        | 14 | 20.8 | 26.5 | 24.1  | 43.6 | 59.9 | 8.7  |
| AP2188, Wk0  | 0.193  | 0  | 25.2 | 25.0 | 95.1  | 38.8 | 45.8 | 15.0 |
| AP2188, Wk4  | 0.310  |    | 24.5 | 28.5 | 96.9  | 49.9 | 40.8 | 12.1 |
| AP2188, Wk8  | 0.161  |    | 23.6 | 29.2 | 86.8  | 59.3 | 64.8 | 13.2 |
| AP2188, Wk16 | 0.059  | 15 | 33.6 | 28.1 | 56.7  | 80.9 | 96.2 | 25.7 |
| AP2188, Wk24 | -0.001 | 4  | 35.1 | 29.7 | 56.9  | 72.5 | 98.8 | 23.5 |
| AP2188, Wk32 | 0.083  |    | 31.3 | 32.5 | 31.4  | 81.7 | 88.8 | 17.0 |
| AP2188, Wk40 | 0.070  | 4  | 29.0 | 25.1 | 31.6  | 87.0 | 76.9 | 15.4 |
| AP2188, Wk45 | 0.053  | 4  | 31.1 | 26.8 | 28.8  | 84.5 | 70.9 | 13.2 |
| AP2188, Wk47 |        | 5  | 34.5 | 27.9 | 35.4  | 85.0 | 74.2 | 14.4 |
| AP2189, Wk0  | 0.491  | 2  | 24.0 | 25.9 | 38.5  | 22.5 | 18.7 | 9.5  |
| AP2189, Wk4  | 0.393  |    | 39.3 | 26.7 | 73.6  | 23.5 | 30.4 | 9.5  |
| AP2189, Wk8  | 0.136  |    | 56.3 | 28.2 | 58.8  | 26.7 | 35.0 | 9.6  |
| AP2189, Wk16 | 0.199  | 7  | 65.9 | 29.8 | 47.3  | 65.0 | 71.1 | 11.4 |

|              |       |   |      |      |      |      |      |      |
|--------------|-------|---|------|------|------|------|------|------|
| AP2189, Wk24 | 0.405 | 6 | 44.1 | 29.6 | 36.6 | 61.1 | 78.2 | 24.7 |
| AP2189, Wk32 | 0.218 |   | 36.8 | 26.8 | 29.6 | 72.2 | 90.7 | 36.9 |
| AP2189, Wk40 | 0.263 | 2 | 39.2 | 28.5 | 32.9 | 71.3 | 83.6 | 32.0 |
| AP2189, Wk45 | 0.342 | 3 | 34.3 | 30.1 | 37.9 | 64.7 | 76.2 | 26.9 |
| AP2189, Wk47 |       | 4 | 36.3 | 30.8 | 34.6 | 63.2 | 76.2 | 30.0 |

ELISA responses (% positive control) to six synthetic lipid antigens and sample information for APHA timeline samples (10 animals at 9 times). Columns 2 and 3 are results for commercial Bovigam IGRA and ParaTB IDEXX assays. \* O.D values from a Bovigam IGRA assay, derived from overnight stimulation of whole blood with PPDA minus a Nil (RPMI only) value; PPDB assays were also carried out. An animal is considered bTB positive if the O.D values of PPDB-PPDA is greater than 0.1 O.D on the Bovigam ELISA; within the limits of the assay, none of these animals were above that value. No IGRA assays were carried out at week 47. \*\* Values of above 55 are considered positive; those between 45 and 55 are intermediate and those below 45 are negatives.

**Table S3: ELISA responses (% positive control) to six synthetic lipid antigens for APHA and Moredun samples**

| Serum ID                       | MOD171 | JRRR121 | RT237F2 | SMP70 | ZAM295 | ST123 |
|--------------------------------|--------|---------|---------|-------|--------|-------|
| ELISA absorbance, % Pooled Pos |        |         |         |       |        |       |
| Reactor 1                      | 30.9   | 23.5    | 33.1    | 71.5  | 64.7   | 32.5  |
| Reactor 2                      | 48.2   | 21.1    | 36.1    | 89.1  | 84.8   | 73.7  |
| Reactor 3                      | 25.4   | 23.3    | 28.5    | 53.5  | 41.1   | 22.4  |
| Reactor 4                      | 31.6   | 23.7    | 26.2    | 46.3  | 70.2   | 25.1  |
| Reactor 5                      | 36.1   | 23.6    | 28.8    | 50.7  | 36.4   | 10.7  |
| Reactor 6                      | 31.4   | 21.5    | 94.0    | 42.0  | 49.7   | 14.2  |
| Reactor 7                      | 29.4   | 26.9    | 36.8    | 27.5  | 28.0   | 13.9  |
| Reactor 8                      | 37.0   | 28.4    | 38.5    | 41.0  | 79.8   | 51.7  |
| Reactor 9                      | 37.9   | 26.5    | 39.2    | 76.7  | 54.1   | 22.9  |
| Reactor 10                     | 30.0   | 24.2    | 57.7    | 73.8  | 66.2   | 23.3  |
| Reactor 11                     | 31.3   | 22.0    | 34.6    | 35.5  | 66.0   | 47.6  |
| Reactor 12                     | 40.8   | 24.7    | 42.9    | 82.4  | 40.6   | 11.0  |
| Reactor 13                     | 204.1  | 22.2    | 61.3    | 46.7  | 41.5   | 8.7   |
| Reactor 14                     | 26.2   | 20.4    | 35.0    | 70.3  | 62.7   | 25.1  |
| Reactor 15                     | 21.4   | 19.7    | 23.9    | 19.9  | 59.4   | 15.9  |
| Reactor 16                     | 26.3   | 22.2    | 28.2    | 43.4  | 34.6   | 8.6   |
| Reactor 17                     | 25.3   | 22.1    | 27.9    | 37.9  | 27.7   | 8.6   |
| Reactor 18                     | 49.7   | 22.2    | 25.5    | 65.3  | 89.1   | 20.2  |
| Reactor 19                     | 46.1   | 24.1    | 57.3    | 54.8  | 64.9   | 43.0  |
| Reactor 20                     | 30.4   | 27.6    | 39.1    | 72.9  | 81.0   | 26.0  |
| Gudair 1                       | 39.0   | 29.4    | 45.2    | 45.0  | 26.5   | 13.0  |
| Gudair 2                       | 35.5   | 23.5    | 138.7   | 25.1  | 23.5   | 8.9   |
| Gudair 3                       | 44.4   | 25.8    | 59.3    | 37.9  | 25.7   | 9.2   |
| Gudair 4                       | 266.3  | 25.1    | 72.0    | 60.5  | 39.3   | 9.8   |
| Gudair 5                       | 32.7   | 22.3    | 36.4    | 28.7  | 21.4   | 8.9   |
| Gudair 6                       | 34.7   | 22.6    | 38.4    | 41.9  | 50.9   | 8.1   |
| Gudair 7                       | 43.7   | 23.7    | 46.6    | 58.9  | 26.5   | 8.5   |
| Gudair 8                       | 40.8   | 25.8    | 58.5    | 55.6  | 25.4   | 9.8   |
| Gudair 9                       | 149.0  | 30.6    | 44.6    | 73.5  | 62.6   | 16.7  |
| Gudair 10                      | 40.5   | 21.4    | 68.6    | 34.2  | 38.1   | 8.3   |
| Gudair 11                      | 64.9   | 24.0    | 129.5   | 80.5  | 63.5   | 15.0  |
| Gudair 12                      | 46.1   | 29.8    | 73.1    | 53.8  | 52.3   | 13.8  |
| Gudair 13                      | 106.6  | 25.9    | 65.6    | 52.0  | 58.4   | 15.5  |
| Gudair 14                      | 47.0   | 23.3    | 171.5   | 62.1  | 65.7   | 12.1  |
| Gudair 15                      | 49.1   | 25.0    | 52.2    | 62.0  | 88.0   | 69.9  |
| Gudair 16                      | 44.8   | 31.2    | 58.3    | 73.9  | 55.3   | 12.2  |
| Gudair 17                      | 103.7  | 25.6    | 57.4    | 46.5  | 34.0   | 9.9   |
| Gudair 18                      | 61.1   | 29.8    | 78.3    | 77.6  | 86.1   | 56.6  |
| Gudair 19                      | 51.8   | 26.3    | 39.4    | 56.3  | 52.8   | 11.0  |



|                |       |      |       |       |      |       |
|----------------|-------|------|-------|-------|------|-------|
| Gudair 20      | 36.6  | 26.8 | 68.5  | 81.6  | 71.7 | 15.1  |
| BCG Vac 1      | 25.0  | 24.4 | 43.5  | 16.6  | 15.0 | 8.8   |
| BCG Vac 2      | 32.8  | 24.8 | 36.4  | 84.0  | 27.2 | 9.8   |
| BCG Vac 3      | 31.1  | 26.8 | 58.5  | 58.3  | 23.6 | 9.4   |
| BCG Vac 4      | 32.7  | 32.5 | 51.5  | 88.6  | 37.9 | 11.5  |
| BCG Vac 5      | 21.1  | 24.9 | 30.5  | 14.3  | 12.0 | 9.4   |
| BCG Vac 6      | 77.2  | 25.5 | 41.8  | 54.1  | 36.3 | 9.4   |
| BCG Vac 7      | 23.3  | 23.0 | 128.4 | 48.1  | 32.9 | 10.3  |
| BCG Vac 8      | 28.8  | 23.8 | 73.4  | 18.1  | 48.2 | 12.8  |
| BCG Vac 9      | 23.8  | 23.1 | 65.0  | 91.2  | 18.2 | 8.5   |
| BCG Vac 10     | 22.2  | 23.9 | 33.9  | 40.2  | 14.4 | 7.9   |
| BCG Vac 11     | 21.3  | 21.5 | 41.3  | 14.6  | 20.1 | 7.4   |
| BCG Vac 12     | 24.3  | 25.3 | 47.4  | 13.5  | 24.8 | 8.6   |
| BCG Vac 13     | 20.2  | 21.3 | 105.3 | 19.3  | 18.3 | 8.7   |
| BCG Vac 14     | 19.9  | 20.8 | 141.4 | 16.3  | 24.5 | 8.2   |
| BCG Vac 15     | 31.3  | 22.9 | 63.0  | 100.1 | 54.4 | 9.0   |
| BCG Vac 16     | 48.6  | 26.4 | 65.4  | 43.0  | 54.0 | 10.2  |
| BCG Vac 17     | 29.4  | 26.6 | 49.0  | 40.7  | 69.8 | 16.1  |
| BCG Vac 18     | 25.9  | 24.3 | 44.3  | 37.0  | 66.6 | 14.4  |
| BCG Vac 19     | 35.7  | 23.0 | 69.4  | 29.5  | 33.6 | 7.6   |
| BCG Vac 20     | 46.1  | 29.3 | 58.1  | 74.0  | 64.5 | 8.9   |
| BCG Vac-Inf 1  | 126.3 | 23.1 | 46.5  | 51.5  | 63.8 | 11.1  |
| BCG Vac-Inf 2  | 28.3  | 30.3 | 140.9 | 47.2  | 61.9 | 13.6  |
| BCG Vac-Inf 3  | 24.6  | 21.8 | 98.4  | 31.0  | 82.8 | 50.8  |
| BCG Vac-Inf 4  | 36.5  | 28.6 | 45.6  | 42.9  | 73.6 | 26.5  |
| BCG Vac-Inf 5  | 31.7  | 27.6 | 52.2  | 69.2  | 59.2 | 10.4  |
| BCG Vac-Inf 6  | 32.1  | 25.8 | 54.6  | 54.5  | 59.2 | 10.9  |
| BCG Vac-Inf 7  | 39.1  | 25.3 | 52.4  | 93.2  | 34.5 | 8.5   |
| BCG Vac-Inf 8  | 38.9  | 30.3 | 99.9  | 53.4  | 62.6 | 11.8  |
| BCG Vac-Inf 9  | 28.5  | 23.5 | 46.8  | 94.3  | 89.4 | 72.0  |
| BCG Vac-Inf 10 | 50.9  | 22.6 | 57.7  | 106.1 | 94.8 | 101.9 |
| BCG Vac-Inf 11 | 21.1  | 22.4 | 41.8  | 54.6  | 47.4 | 8.1   |
| BCG Vac-Inf 12 | 26.7  | 31.9 | 46.6  | 39.9  | 64.4 | 14.2  |
| BCG Vac-Inf 13 | 42.7  | 28.7 | 46.4  | 79.7  | 31.0 | 9.7   |
| BCG Vac-Inf 14 | 25.8  | 23.5 | 42.4  | 30.4  | 72.6 | 43.7  |
| BCG Vac-Inf 15 | 31.7  | 24.3 | 44.3  | 43.2  | 41.5 | 8.4   |
| BCG Vac-Inf 16 | 56.6  | 29.3 | 45.6  | 97.7  | 93.6 | 85.1  |
| BCG Vac-Inf 17 | 149.2 | 26.2 | 56.1  | 58.2  | 45.4 | 10.2  |
| BCG Vac-Inf 18 | 33.9  | 25.6 | 56.7  | 47.7  | 72.7 | 16.4  |
| BCG Vac-Inf 19 | 27.6  | 23.6 | 37.9  | 75.3  | 44.7 | 10.8  |
| BCG Vac-Inf 20 | 41.7  | 29.8 | 46.9  | 99.2  | 61.1 | 17.9  |
| Control 1      | 31.8  | 26.1 | 41.9  | 87.8  | 66.8 | 38.4  |
| Control 2      | 27.0  | 23.0 | 38.8  | 55.3  | 83.1 | 50.4  |
| Control 3      | 41.7  | 27.2 | 90.1  | 75.0  | 63.7 | 27.3  |
| Control 4      | 39.4  | 31.0 | 61.4  | 26.6  | 27.1 | 10.3  |
| Control 5      | 41.3  | 26.3 | 63.9  | 66.3  | 53.5 | 13.2  |

|            |         |      |      |       |      |      |      |
|------------|---------|------|------|-------|------|------|------|
| Control 6  |         | 28.8 | 25.7 | 58.1  | 53.5 | 21.7 | 9.8  |
| Control 7  |         | 27.4 | 32.0 | 46.1  | 54.6 | 46.4 | 11.1 |
| Control 8  |         | 45.2 | 34.8 | 80.9  | 71.2 | 79.0 | 22.5 |
| Control 9  |         | 39.1 | 27.2 | 115.0 | 85.6 | 45.4 | 12.2 |
| Control 10 |         | 32.4 | 23.9 | 34.7  | 81.6 | 40.6 | 9.5  |
| Control 11 |         | 33.3 | 24.4 | 126.2 | 29.8 | 53.6 | 9.9  |
| Control 12 |         | 38.7 | 28.6 | 39.0  | 47.8 | 80.9 | 37.9 |
| Control 13 |         | 37.7 | 29.2 | 56.5  | 45.3 | 60.0 | 10.2 |
| Control 14 |         | 26.8 | 23.3 | 71.6  | 69.5 | 19.5 | 7.4  |
| Control 15 |         | 29.4 | 24.7 | 45.7  | 19.3 | 24.9 | 7.9  |
| Control 16 |         | 37.0 | 34.7 | 60.2  | 59.2 | 32.8 | 8.9  |
| Control 17 |         | 33.1 | 33.5 | 98.6  | 35.0 | 28.1 | 9.7  |
| Control 18 |         | 28.6 | 25.1 | 41.0  | 17.6 | 31.8 | 7.8  |
| Control 19 |         | 29.6 | 23.0 | 37.9  | 16.6 | 23.0 | 7.6  |
| Control 20 |         | 31.9 | 25.0 | 37.9  | 68.3 | 49.0 | 10.3 |
| MRI153     | Moredun | 22.2 | 17.8 | 49.1  | 34.0 | 63.7 | 21.3 |
| MRI156     |         | 22.2 | 18.2 | 82.6  | 50.2 | 35.7 | 10.7 |
| MRI397     |         | 22.8 | 17.7 | 49.7  | 48.0 | 79.6 | 44.9 |
| MRI398     |         | 24.4 | 17.8 | 43.9  | 57.6 | 73.4 | 38.3 |
| MRI402     |         | 17.2 | 17.5 | 38.4  | 28.1 | 63.1 | 17.6 |
| MRI403     |         | 29.2 | 27.4 | 54.7  | 63.5 | 62.7 | 11.1 |
| MRI404     |         | 24.7 | 15.7 | 48.9  | 36.8 | 70.4 | 23.5 |
| MRI405     |         | 19.7 | 16.6 | 39.7  | 35.8 | 45.2 | 13.2 |
| MRI406     |         | 28.9 | 20.0 | 50.4  | 35.5 | 84.0 | 6.6  |

ELISA responses (% positive control) to six synthetic lipid antigens for APHA and Moredun samples

**Figure S1 Structures of synthetic antigens used in this work**

**MOD171**

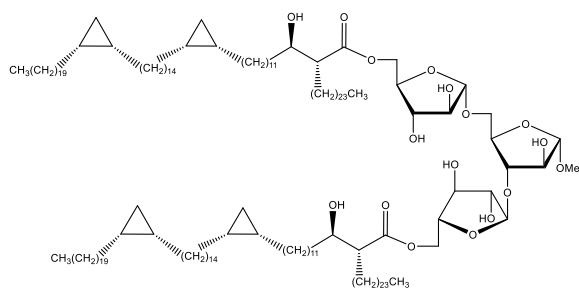

**SMP70**

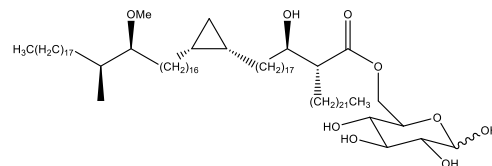

**ZAM295**

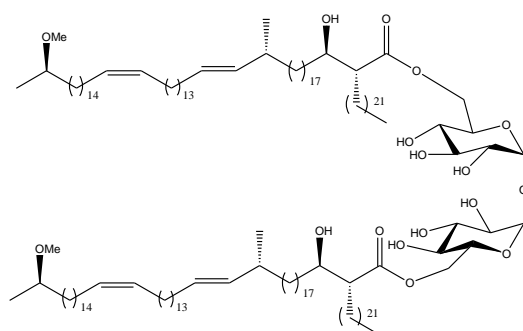

**RT237-F2**

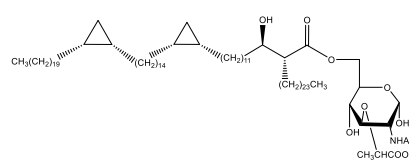

**ST123**

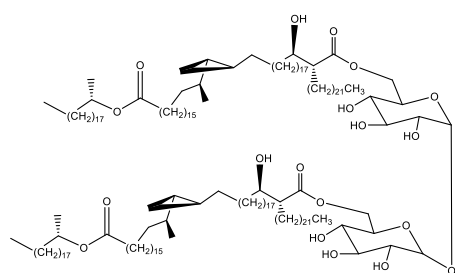

**JRRR121**

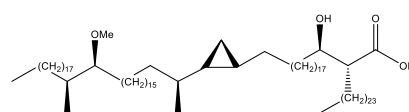

**Table S4: Median ELISA responses for each set of samples with each of six antigens as % positive control for that antigen.**

|               |                                            | MOD<br>171              | JRRR<br>121 | RT237<br>F2 | SMP<br>70 | ZAM<br>295 | ST<br>123 |  | ST,<br>ZAM                                        | ST,<br>JR | ST, JR,<br>ZAM | JR,SMP,<br>ZAM | All Six<br>Antigen |
|---------------|--------------------------------------------|-------------------------|-------------|-------------|-----------|------------|-----------|--|---------------------------------------------------|-----------|----------------|----------------|--------------------|
|               |                                            | Absorbance % Pooled Pos |             |             |           |            |           |  | Combined Antigen Positive Probability<br>(0 to 1) |           |                |                |                    |
|               |                                            |                         |             |             |           |            |           |  |                                                   |           |                |                |                    |
| PEI++         | Median +                                   | 27.3                    | 38.8        | 56.5        | 88.4      | 96.3       | 79.0      |  | 0.9                                               | 0.9       | 0.9            | 0.9            | 0.8                |
| F5 plus<br>F6 | Median -                                   | 24.7                    | 17.4        | 48.8        | 54.2      | 50.7       | 23.7      |  | 0.1                                               | 0.1       | 0.1            | 0.1            | 0.1                |
|               | ROC AUC                                    | 0.55                    | 0.88        | 0.64        | 0.82      | 0.95       | 0.9       |  | 0.91                                              | 0.91      | 0.94           | 0.92           | 0.93               |
|               | ROC threshold                              | 33.8                    | 24.8        | 49.2        | 74.1      | 88.9       | 27.0      |  | 61.4                                              | 64.5      | 42.5           | 53.3           | 44.6               |
|               | Sensitivity                                | 44.8                    | 81.3        | 75.0        | 75.0      | 87.5       | 100.0     |  | 87.5                                              | 75.0      | 93.8           | 87.5           | 93.8               |
|               | Specificity %                              | 78.8                    | 85.0        | 51.3        | 80.0      | 92.5       | 61.3      |  | 90.0                                              | 97.5      | 87.5           | 92.5           | 86.3               |
|               | <b>Cut-off for &gt;93%<br/>specificity</b> | 57                      | 40          | 76          | 93        | 91         | 68        |  | 0.8                                               | 0.63      | 0.73           | 0.63           | 0.78               |
|               | <b>Sensitivity %</b>                       | 25                      | 50          | 6.25        | 37.5      | 75         | 62.5      |  | 56.25                                             | 75        | 68.75          | 68.75          | 68.75              |
|               | <b>Specificity %</b>                       | 95.0                    | 96.3        | 93.8        | 95.0      | 93.8       | 93.8      |  | 93.8                                              | 97.5      | 97.5           | 97.5           | 100.0              |
|               | <b>Accuracy</b>                            | 60.0                    | 73.1        | 50.0        | 66.3      | 84.4       | 78.1      |  | 75.0                                              | 86.3      | 83.1           | 83.1           | 84.4               |
|               |                                            |                         |             |             |           |            |           |  |                                                   |           |                |                |                    |
| F5            | Median -                                   | 24.8                    | 19.4        | 55.2        | 43.5      | 50.7       | 21.4      |  | 0.0                                               | 0.1       | 0.1            | 0.1            | 0.1                |
| Negatives     | Cut-off                                    | 57                      | 40          | 76          | 93        | 91         | 68        |  | 0.8                                               | 0.63      | 0.73           | 0.63           | 0.78               |
|               | Specificity %                              | 97.5                    | 92.5        | 92.5        | 95        | 95         | 97.5      |  | 97.5                                              | 100       | 97.5           | 100            | 100                |
|               |                                            |                         |             |             |           |            |           |  |                                                   |           |                |                |                    |
| F6            | Median -                                   | 24.6                    | 15.4        | 45.0        | 64.5      | 51.2       | 27.9      |  | 0.1                                               | 0.2       | 0.1            | 0.1            | 0.1                |
| Negatives     | Cut-off                                    | 57                      | 40          | 76          | 93        | 91         | 68        |  | 0.8                                               | 0.63      | 0.73           | 0.63           | 0.78               |
|               | Specificity %                              | 92.5                    | 100         | 95          | 95        | 92.5       | 90        |  | 90                                                | 95        | 97.5           | 95             | 100                |

**Median ELISA responses for each set of samples with each of six antigens as % positive control for that antigen.** Optimal cut-offs are based on 16 PEI culture and IDEXX positive samples (PEI++) compared to all 80 PEI F5 and F6 negatives (again as % positive control), and sensitivity and specificity of each group based on those cut-offs. ROC analysis of these data is presented graphically in Fig S2. In some cases, such as for MOD171, the optimal cut-off by ROC analysis led to a very low specificity; cut-offs were then identified to give maximum accuracy (average of sensitivity and specificity) at >93 % specificity. The final five columns show the median calculated negative or positive status (on 0 to 1 scale) of PEI++ compared to all 80 F5 and F6 negative samples, combining results with several specified antigens using the R statistics package. These calculated values for each serum sample have then been analysed by ROC (shown graphically in Fig S2) and optimal cut-offs determined to provide the highest accuracy (average of sensitivity and specificity). Again, where the ROC analysis gave a specificity of below 93%, the cut-off was adjusted to meet that value. The data for F5 and F6 samples are also presented separately, using the same cut-offs.

**Figure S2:** ROC analysis of ELISA responses for PEI++ samples compared to 80 F5 and F6 negatives

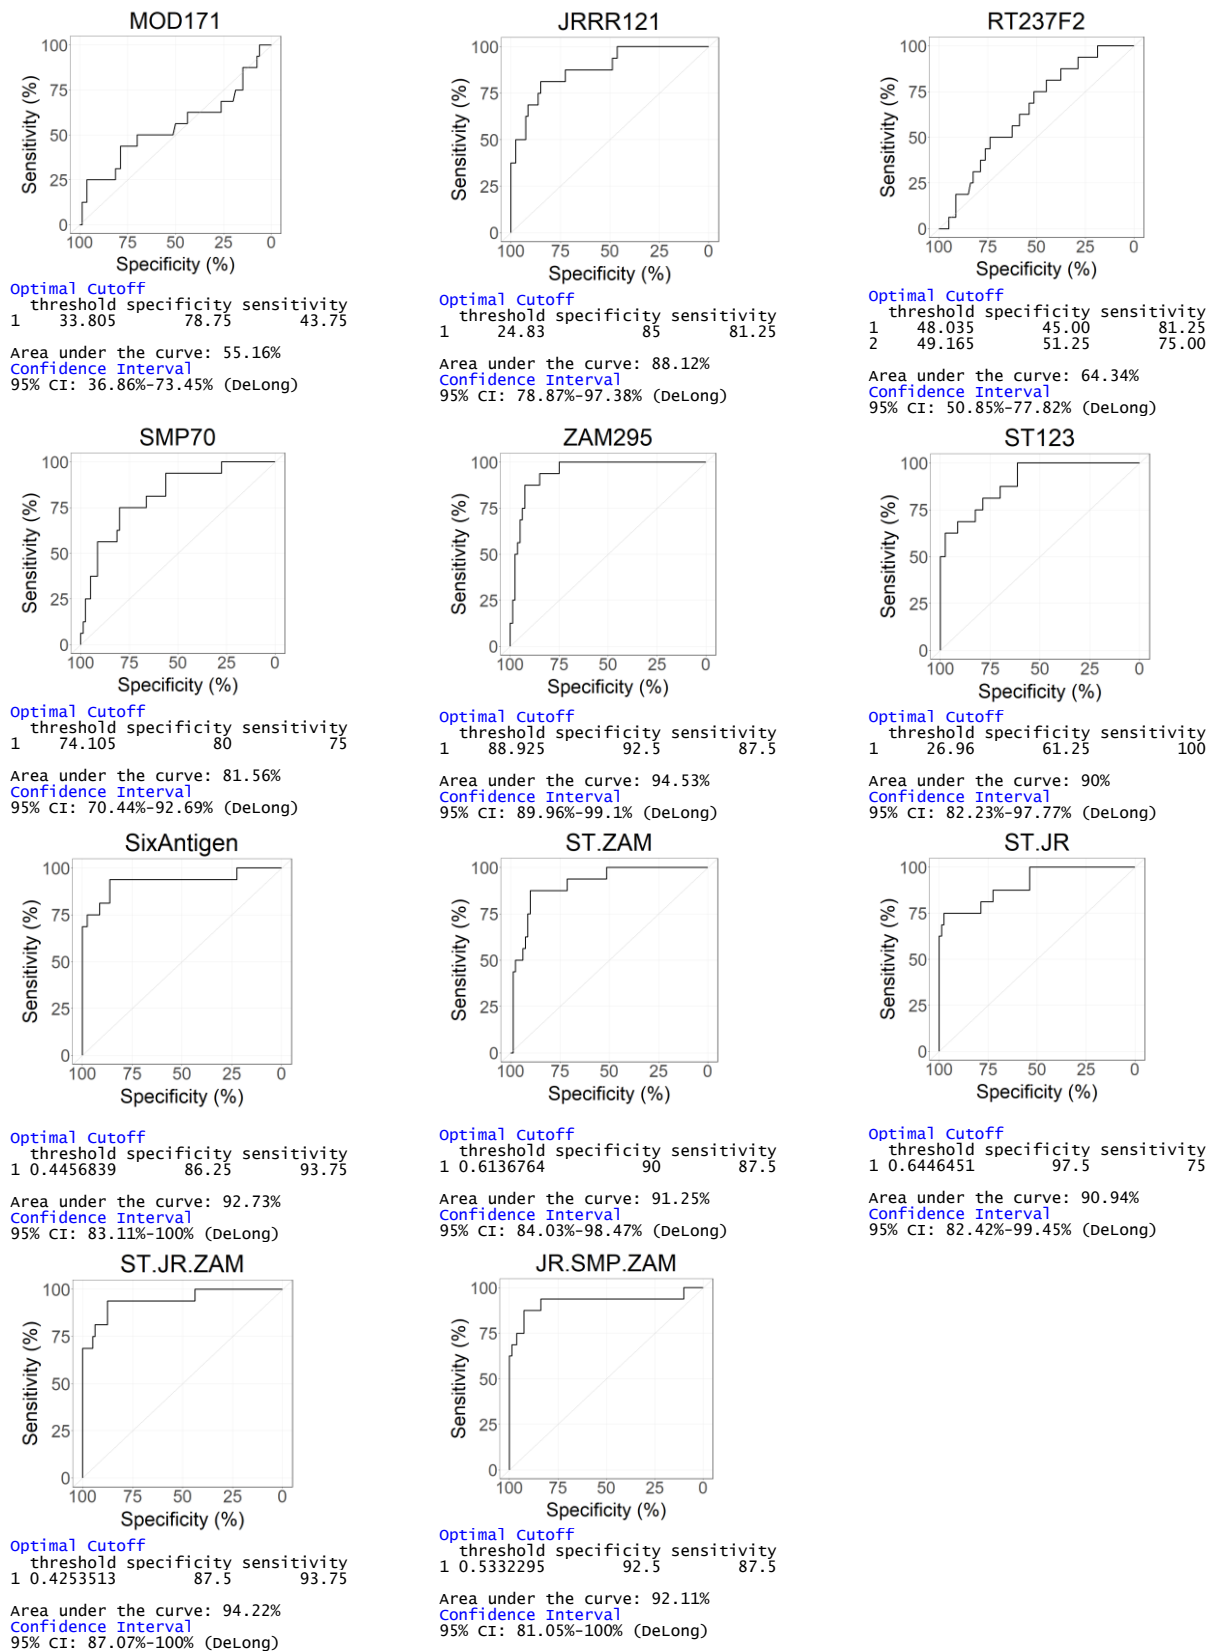

**Figure S3:** Box plots showing distribution of ELISA responses for each group of samples PEI++, F5 and F6 when combined in R as in Tables 1 and S1.

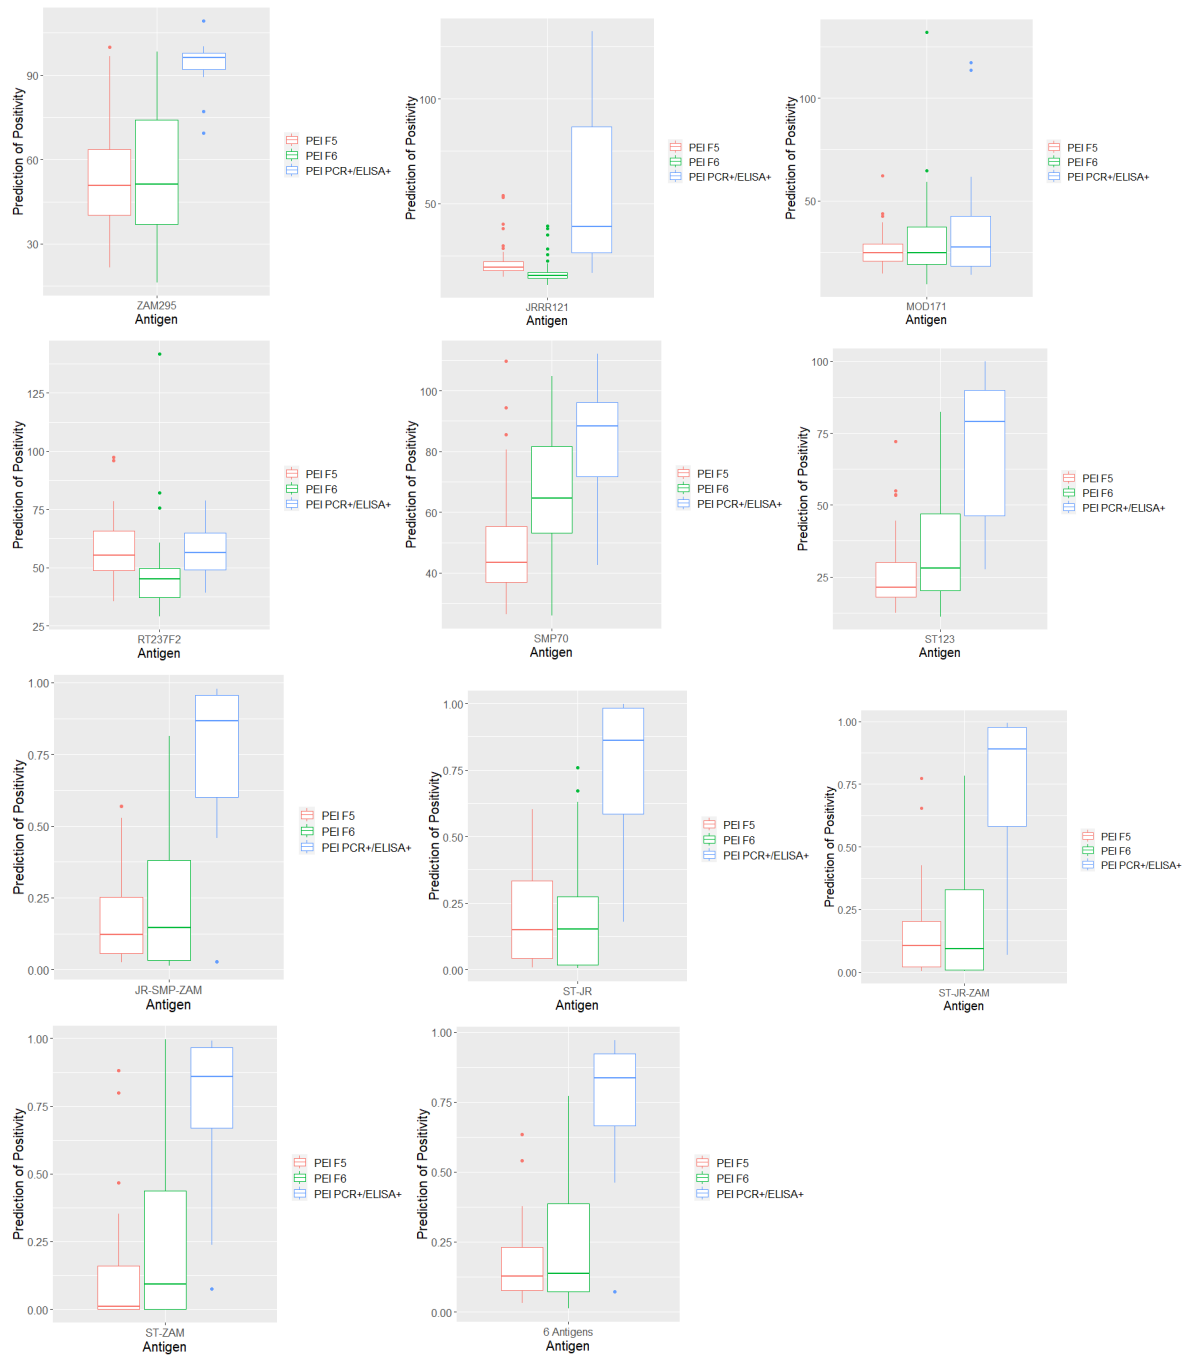

**Table S5: Median ELISA responses (as % positive control) and sensitivity/specificity for Moredun ‘no history’ samples and for each cohort of APHA serum samples, using the same cut-offs as determined in Table 1.**

|                                                                             |  |               | MOD<br>171              | JRRR<br>121 | RT237<br>F2 | SMP<br>70 | ZAM<br>295 | ST<br>123 | ST,<br>ZAM  | ST,<br>JR | ST,<br>JR,<br>ZAM | JR,<br>SMP,<br>ZAM | All Six<br>Antigen |
|-----------------------------------------------------------------------------|--|---------------|-------------------------|-------------|-------------|-----------|------------|-----------|-------------|-----------|-------------------|--------------------|--------------------|
|                                                                             |  |               | Absorbance % Pooled Pos |             |             |           |            |           | Probability |           |                   |                    |                    |
| All negatives<br>(PEI F5/F6, controls,<br>BCG/Gudair,<br>timeline, moredun) |  | Median -      | 27.7                    | 24.7        | 45.7        | 50.3      | 52.9       | 14.0      | 0.0         | 0.2       | 0.1               | 0.2                | 0.1                |
| n = 239                                                                     |  | Cut-off       | 57                      | 40          | 76          | 93        | 91         | 68        | 0.8         | 0.63      | 0.73              | 0.63               | 0.78               |
|                                                                             |  | Sensitivity % | 25.0                    | 50.0        | 6.3         | 37.5      | 75.0       | 62.5      | 56.3        | 75.0      | 68.8              | 68.8               | 68.8               |
|                                                                             |  | Specificity % | 94.6                    | 98.3        | 90.0        | 96.7      | 94.6       | 96.2      | 95.8        | 94.6      | 96.2              | 92.5               | 99.2               |
|                                                                             |  |               |                         |             |             |           |            |           |             |           |                   |                    |                    |
| Reactors                                                                    |  | Median -      | 31.4                    | 23.4        | 35.5        | 52.1      | 61.1       | 22.6      | 0.1         | 0.2       | 0.1               | 0.2                | 0.2                |
| n = 20                                                                      |  | Specificity % | 95.0                    | 100.0       | 95.0        | 100.0     | 100.0      | 95.0      | 100.0       | 90.0      | 100.0             | 100.0              | 100.0              |
|                                                                             |  |               |                         |             |             |           |            |           |             |           |                   |                    |                    |
| Gudair vac                                                                  |  | Median -      | 45.4                    | 25.7        | 58.9        | 55.9      | 51.6       | 11.5      | 0.0         | 0.2       | 0.1               | 0.1                | 0.1                |
| n = 20                                                                      |  | Specificity % | 70.0                    | 100.0       | 80.0        | 100.0     | 100.0      | 95.0      | 100.0       | 90.0      | 95.0              | 90.0               | 100.0              |
|                                                                             |  |               |                         |             |             |           |            |           |             |           |                   |                    |                    |
| BCG Vac                                                                     |  | Median -      | 27.4                    | 24.4        | 54.8        | 40.5      | 30.0       | 9.2       | 0.0         | 0.1       | 0.1               | 0.1                | 0.1                |
| n = 20                                                                      |  | Specificity % | 95.0                    | 100.0       | 85.0        | 95.0      | 100.0      | 100.0     | 100.0       | 100.0     | 100.0             | 100.0              | 100.0              |
|                                                                             |  |               |                         |             |             |           |            |           |             |           |                   |                    |                    |
| BCG Vac-Inf                                                                 |  | Median -      | 33.0                    | 25.7        | 46.9        | 54.6      | 62.2       | 12.7      | 0.1         | 0.2       | 0.1               | 0.3                | 0.2                |
| n = 20                                                                      |  | Specificity % | 90.0                    | 100.0       | 85.0        | 75.0      | 90.0       | 85.0      | 90.0        | 90.0      | 85.0              | 85.0               | 90.0               |
|                                                                             |  |               |                         |             |             |           |            |           |             |           |                   |                    |                    |
| APHA Control                                                                |  | Median -      | 32.7                    | 26.2        | 57.3        | 54.9      | 45.9       | 10.3      | 0.0         | 0.2       | 0.1               | 0.2                | 0.1                |
| n = 20                                                                      |  | Specificity % | 100.0                   | 100.0       | 75.0        | 100.0     | 100.0      | 100.0     | 100.0       | 100.0     | 100.0             | 95.0               | 100.0              |
|                                                                             |  |               |                         |             |             |           |            |           |             |           |                   |                    |                    |
| Moredun serum                                                               |  | Median -      | 22.8                    | 17.8        | 49.1        | 36.8      | 63.8       | 17.6      | 0.1         | 0.1       | 0.1               | 0.2                | 0.2                |
| n = 9                                                                       |  | Specificity % | 100.0                   | 100.0       | 88.9        | 100.0     | 100.0      | 100.0     | 100.0       | 100.0     | 100.0             | 100.0              | 100.0              |
|                                                                             |  |               |                         |             |             |           |            |           |             |           |                   |                    |                    |
| Timeline                                                                    |  | Median -      | 31.8                    | 25.0        | 53.7        | 51.0      | 51.2       | 10.6      | 0.0         | 0.2       | 0.1               | 0.2                | 0.1                |
| n = 90                                                                      |  | Specificity % | 97.8                    | 98.9        | 93.3        | 96.7      | 91.1       | 96.7      | 94.4        | 90.0      | 93.3              | 85.6               | 97.8               |
|                                                                             |  |               |                         |             |             |           |            |           |             |           |                   |                    |                    |
| PEI+/-                                                                      |  | Median+ -     | 23.5                    | 21.2        | 56.5        | 64.0      | 66.6       | 29.8      | 0.2         | 0.3       | 0.3               | 0.3                | 0.3                |
| n = 64                                                                      |  | Specificity % | 95.3                    | 87.5        | 75.0        | 93.8      | 79.7       | 87.5      | 82.8        | 76.6      | 87.5              | 81.3               | 95.3               |
|                                                                             |  | Positives     | 3                       | 8           | 16          | 4         | 13         | 8         | 11          | 15        | 8                 | 12                 | 3                  |

**Median ELISA responses (as % positive control) and sensitivity/specificity for Moredun ‘no history’ samples and for each cohort of APHA serum samples, using the same cut-offs as determined in Table 1.** PEI++ data show the corresponding sensitivity with the 16 PEI samples both positive to culture and giving IDEXX responses above the recommended cut-off for MAP infection. Specificity values for single antigens are determined from Table S4 using the cut-offs from Table 1. Specificity values for combinations of antigens using R for each cohort are calculated using the antigen

combinations determined in Table 1; the cut-off for R calculations are as in Table 1 and are on a scale 0 (negative) to 1 (positive), applied to the data in Tables S6 and S7

**Figure S4:** Box plots showing distribution of ELISA responses for each group of samples PEI++, F5 and F6 compared to Moredun and APHA cohorts

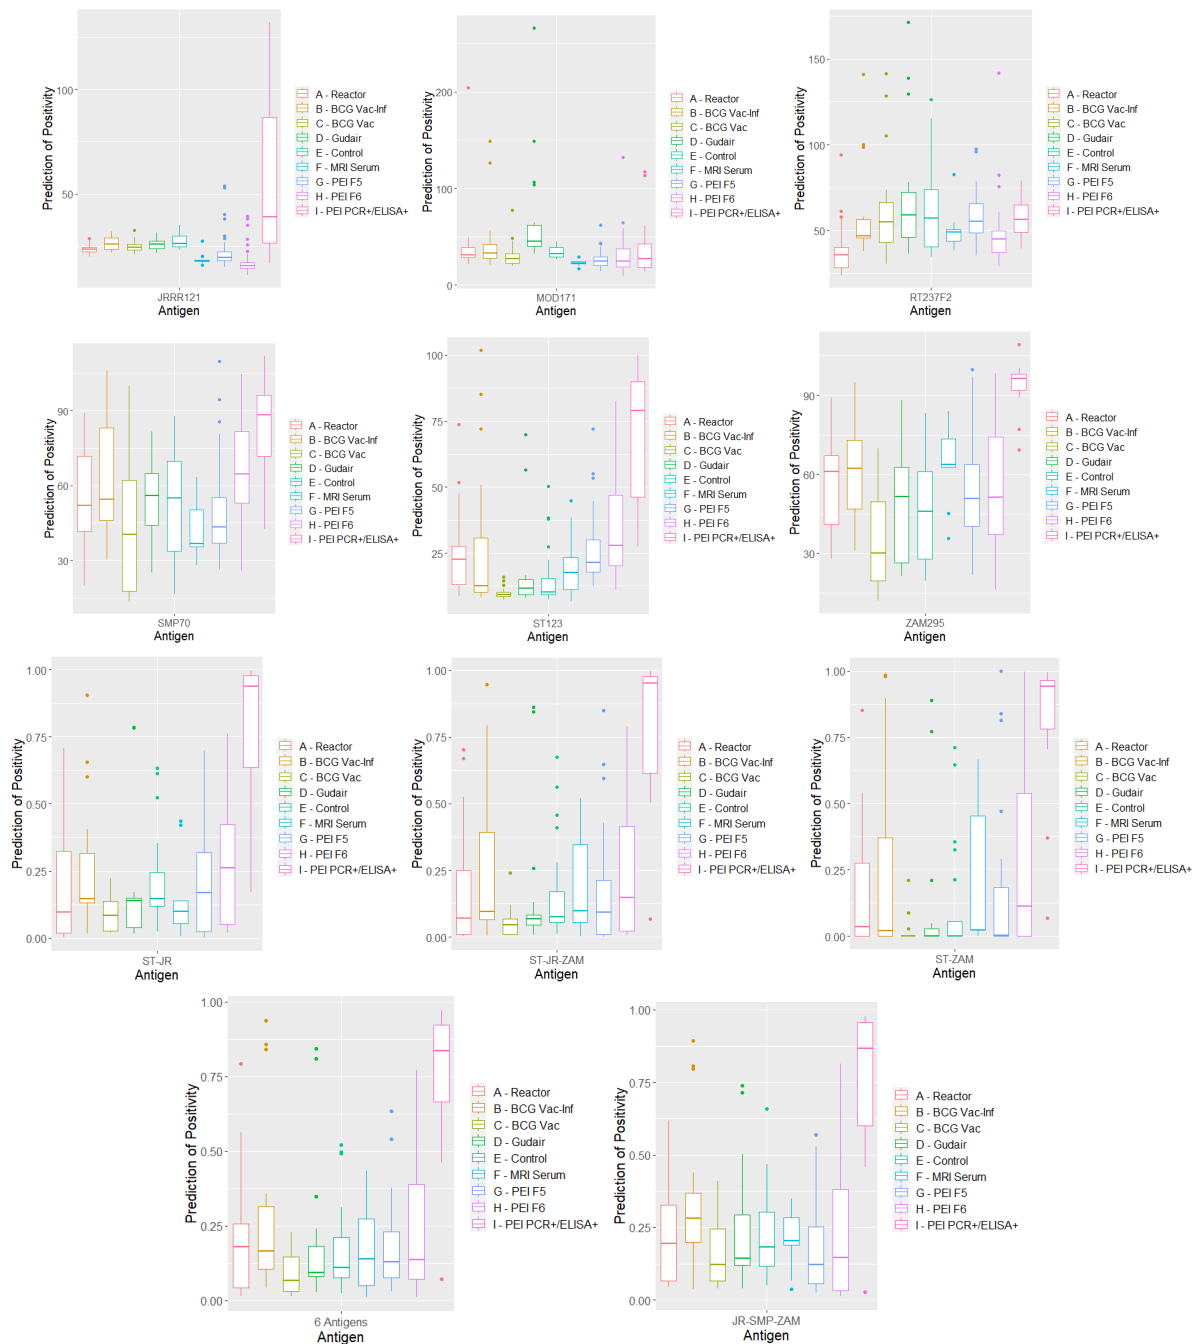



**Table S6.** Analysis of all 80 PEI PCR samples giving non-zero cycle counts (Table S1) with cut-offs optimised for maximum accuracy compared to all 80 F5 and F6 negatives.

|                                                |  | Cut-off          | 56                      | 38          | 94          | 90        | 94         | 65        | 0.75                             | 0.68      | 0.71               | 0.69              | 0.7            | 0.7               |
|------------------------------------------------|--|------------------|-------------------------|-------------|-------------|-----------|------------|-----------|----------------------------------|-----------|--------------------|-------------------|----------------|-------------------|
|                                                |  |                  | MOD<br>171              | JRRR<br>121 | RT237<br>F2 | SMP<br>70 | ZAM<br>295 | ST<br>123 | ST,<br>ZAM                       | ST,<br>JR | SMP,<br>JR,<br>ZAM | ST,<br>JR,<br>ZAM | Six<br>Antigen | ST,<br>JR,<br>SMP |
|                                                |  |                  | Absorbance % Pooled Pos |             |             |           |            |           | Probability of positive (0 to 1) |           |                    |                   |                |                   |
|                                                |  |                  |                         |             |             |           |            |           |                                  |           |                    |                   |                |                   |
|                                                |  | Sensitivity<br>% | 10.0                    | 20.0        | 8.8         | 12.5      | 22.5       | 26.3      | 22.5                             | 37.5      | 38.8               | 38.8              | 36.3           | 28.75             |
| F5F6                                           |  | Specificity<br>% | 92.5                    | 92.5        | 96.3        | 91.3      | 95.0       | 91.3      | 95.0                             | 97.5      | 95.0               | 95.0              | 95.0           | 96.25             |
| F5                                             |  | Specificity<br>% | 95                      | 97.5        | 95          | 95        | 92.5       | 87.5      | 92.5                             | 97.5      | 92.5               | 92.5              | 95             | 100               |
| F6                                             |  | Specificity<br>% | 90                      | 87.5        | 97.5        | 87.5      | 97.5       | 95        | 97.5                             | 97.5      | 95                 | 97.5              | 95             | 92.5              |
|                                                |  |                  |                         |             |             |           |            |           |                                  |           |                    |                   |                |                   |
| All, minus APHA<br>Reactors and<br>BCG Vac-Inf |  | Specificity<br>% | 93.3                    | 97.1        | 92.9        | 94.6      | 95.8       | 95.0      | 96.2                             | 91.2      | 87.0               | 85.8              | 95.4           | 92.1              |
|                                                |  |                  |                         |             |             |           |            |           |                                  |           |                    |                   |                |                   |
| Reactor                                        |  | Specificity<br>% | 95.0                    | 100.0       | 100.0       | 100.0     | 100.0      | 95.0      | 100.0                            | 85.0      | 90.0               | 90.0              | 100.0          | 90.0              |
|                                                |  |                  |                         |             |             |           |            |           |                                  |           |                    |                   |                |                   |
| Gudair                                         |  | Specificity<br>% | 70.0                    | 100.0       | 85.0        | 100.0     | 100.0      | 95.0      | 100.0                            | 90.0      | 90.0               | 90.0              | 95.0           | 95.0              |
|                                                |  |                  |                         |             |             |           |            |           |                                  |           |                    |                   |                |                   |
| BCG Vac                                        |  | Specificity<br>% | 95.0                    | 100.0       | 85.0        | 90.0      | 100.0      | 100.0     | 100.0                            | 100.0     | 100.0              | 100.0             | 100.0          | 100.0             |
|                                                |  |                  |                         |             |             |           |            |           |                                  |           |                    |                   |                |                   |
| BCG Vac-Inf                                    |  | Specificity<br>% | 85.0                    | 100.0       | 85.0        | 75.0      | 95.0       | 85.0      | 90.0                             | 80.0      | 85.0               | 80.0              | 90.0           | 85.0              |
|                                                |  |                  |                         |             |             |           |            |           |                                  |           |                    |                   |                |                   |
| Control                                        |  | Specificity<br>% | 100.0                   | 100.0       | 85.0        | 100.0     | 100.0      | 100.0     | 100.0                            | 85.0      | 95.0               | 85.0              | 90.0           | 85.0              |
|                                                |  |                  |                         |             |             |           |            |           |                                  |           |                    |                   |                |                   |
| TL                                             |  | Specificity<br>% | 96.7                    | 98.9        | 94.4        | 95.6      | 93.3       | 95.6      | 94.4                             | 84.4      | 74.4               | 72.2              | 95.6           | 86.7              |
|                                                |  |                  |                         |             |             |           |            |           |                                  |           |                    |                   |                |                   |
| Moredun serum                                  |  | Specificity<br>% | 100.0                   | 100.0       | 100.0       | 100.0     | 100.0      | 100.0     | 100.0                            | 100.0     | 100.0              | 100.0             | 100.0          | 100.0             |

Analysis of all 80 PEI PCR samples giving non-zero cycle counts (Table S1) with cut-offs optimised for maximum accuracy compared to all 80 F5 and F6 negatives. Cut-offs adjusted to give a minimum specificity with each antigen of 91 %, and with each antigen combination in R of 92.5 %. Data for F5 and F6 are then presented separately. Data for other cohorts of cattle analysed to the same cut-offs. Results with each other sub-set then analysed to same cut-offs and same antigen combinations in the R statistics package.
